# Supplementary material for: The impact of peripheral circulation characteristics of typhoon on sustained ozone episodes over the Pearl River Delta region, China
Source: Copernicus journal article supplement (doi:10.5194/acp-2021-618), 2021-10-25
Supplement: Supplementary file [file acp-2021-618-AC2-supplement.pdf]

Re: acp-2021-618 "The impact of peripheral circulation characteristics of typhoon on sustained ozone episodes over the Pearl River Delta region, China" by Ying Li et al."

## Responses to Reviewer comment

In this manuscript, the authors gave a very details study of ozone photochemistry and the meteorology (weak wind deepening, WWD) induced by the periphery of typhoon circulations by statistical analysis from 38 case observations and one case model simulations. The topic is of great interesting to recognize ozone accumulation in daily scale from each processes of physics and chemistry. The analysis is mostly sound, but the presentation need substantial improve, and some details need clarify. I recommend a minor revision and my comments listed below.

Specific comments:

(1) The presentation of the manuscript is not concise, and many sentences are not well structured. For example, in the abstract, the much long sentence from line 18- 22, is too long and not easy to grasp main points for readers.

Reply: Thank you very much for your comments. We have revised through the manuscript, especially the section 3.4, abstract, and conclusion. We also modify the English writing throughout the manuscript and re-consulting the official English editing service to improve the presentation. Please see the invoice of the service below

|                                                                                                                                               |  |                                                                                                           |    |                                                                                                                                 |                                                                                           |              |    |         |
|-----------------------------------------------------------------------------------------------------------------------------------------------|--|-----------------------------------------------------------------------------------------------------------|----|---------------------------------------------------------------------------------------------------------------------------------|-------------------------------------------------------------------------------------------|--------------|----|---------|
| <br>机器编号: 661833075515                                     |  | <b>上海增值税电子普通发票</b><br> |    |                                                                                                                                 | 发票代码: 031002000411<br>发票号码: 31660386<br>开票日期: 2021年06月17日<br>校验码: 60431 04133 34473 82836 |              |    |         |
|                                                                                                                                               |  | 名称: 南方科技大学<br>纳税人识别号: 124403005521093031<br>地址、电话:<br>开户行及账号:                                             |    | 密 区<br>4>>24<004>4418<3-9/19075413<br>>55>>-**11221-46/4<0-+63-51<br>+/202*492+*/+1590*6688/5944<br>459-977>>>9<01661866/0/6266 |                                                                                           |              |    |         |
| 项目名称<br>*现代服务*英文论文编校                                                                                                                          |  | 规格型号                                                                                                      | 单位 | 数量                                                                                                                              | 单价                                                                                        | 金额           | 税率 | 税额      |
|                                                                                                                                               |  |                                                                                                           |    | 1                                                                                                                               | 2094                                                                                      | 2094.00      | 6% | 125.64  |
| 合 计                                                                                                                                           |  |                                                                                                           |    |                                                                                                                                 |                                                                                           | ¥2094.00     |    | ¥125.64 |
| 价税合计(大写)                                                                                                                                      |  | <input checked="" type="checkbox"/> 贰仟贰佰壹拾玖圆陆角肆分                                                          |    |                                                                                                                                 | (小写) ¥2219.64                                                                             |              |    |         |
| 名称: 开科思(上海)商务信息咨询有限公司<br>纳税人识别号: 91310115563144366Q<br>地址、电话: 上海市浦东新区上川路580号101室 021-58209795<br>开户行及账号: 中国工商银行上海市浦东开发区支行 1001281209016263918 |  | 备 注<br>Alipay<br>FTFHQ_1_2                                                                                |    |                                            |                                                                                           |              |    |         |
| 收款人: 杨华                                                                                                                                       |  | 复核: 许飘飘                                                                                                   |    | 开票人: 高佳荧                                                                                                                        |                                                                                           | 销售方(章) 发票专用章 |    |         |

(2) In abstract, IPR, ADV, HDIV etc. need define.

Reply: Thanks. We have double checked all the abbreviation and pay attention to the define it at first mention.

(3) In line 25, I suggest that “the decrease of advection outflow” replaces “the decrease of the negative ADV”, making the presentation more direct and easy to understand.

Reply: Thank you very much. We follow this comment. “the decrease of the negative ADV” have been replaced by “the decrease of advection outflow”. Please check the detail in the revised manuscript at lines 333 and 358.

(4)In line 30, I suggest delete “ By using the mass continuity equation,”.

Reply: Thank you. We follow this comment.

(5)In line 33, “typhoon could also produce significant positive ADV” seems opposite to the means of “the decrease of the negative ADV” in line 25.

Reply: Thank you very much. In the original manuscript, these two mentioned sentence does not conflict. The positive ADV contribution and decrease of the negative ADV contribution could happened at different locations. To make the manuscript more concise, we have deleted the analysis by using the mass continuity equation. Therefore, the related results (“typhoon could also produce significant positive ADV”) in the abstract have been also deleted.

(6)The legends are much different in fig.2e-h, m/s and not easy to compare.

Reply: Thank you for your comment. Figure 2a-d shows the horizontal wind field, while the figure 2e-h show the vertical wind velocity long the highlighted cross section. Here, we present the vertical velocity in Figure 2e-h to show the center of the typhoon movement and development by the strong rising air (represented by the negative values in Figure 2e-h). We do not aim to compare the horizontal wind to vertical wind, since the vertical velocity is much smaller than the horizontal wind velocity, it is hard to compare between the absolute wind speed between the vertical and horizontal direction, even though in same unit.

(7)In line 142, What is the “parcel traces”?

Reply: “parcel traces” means the path of of air parcel at vertical direction which include the dry adiabatic rise of air parcel from the ground and the path of wet adiabatic rise after reaching Lift condensation level (LCL). To make it more clear, we modify it to “parcel path” in the revised manuscript.

(8)In line 162-164, I am confused by the conclusion of “the TCs-Ozone episodes are not dependent on the enhancement of atmospheric thermal-dynamical stability and reduction of the PBL”, because just in previous sentence in line 160, you say “TC causes descending air motions to force the aerosol particles into a very shallow layer,” . The sentence in line 160 means “the enhancement of atmospheric thermal-dynamical stability and reduction of the PBL”.

Reply: Thank you very much. “TC causes descending air motions to force the aerosol particles into a very shallow layer,” in line 135~136 in revised manuscript is the conclusion of Wu et al(2005) in the reference and it is not the conclusion of our manuscript. The opinion of author of

manuscript is different from the conclusion of Wu et al(2005). “the TCs-Ozone episodes are not dependent on the enhancement of atmospheric thermal-dynamical stability and reduction of the PBL” in lines 138~139 is the opinion of authors of manuscript based on observational results. To make it more clear, we have revised these sentence as follows in the revised manuscript.

“ These results illustrate that, under the control of typhoon periphery, the PBL height can be increased in unstable atmospheric conditions, which is opposite from the observations in some TCs-haze events (Wu et al., 2005 and Feng et al., 2007). For example, the research of Wu et al.(2005) reported that the TC produces a strong descending motions in the lower troposphere, a weak surface wind speeds, and a lower PBL. Our observational results indicate that the TCs-Ozone episodes are not dependent on the enhancement of atmospheric thermal-dynamical stability and reduction of the PBL. “

(9)In line 177, On the nightàat the night

Reply: Thank you. This typo is no longer exist in this revised manuscript.

(10)Define the parameters in table 2.

Reply: Thank you very much. The parameters in table 2 have been defined. Please check the detail in table 2 in the revised manuscript.

(11)In section 3.4, the presentation is not concise and I feel it's not necessary to introduce equations 5, etc. Processes Analysis is enough to explain the sustained processes of ozone in daily variations.

Reply: Thank you very much. We follow the comment. We have moved the Eqs. (1)-(3) and (5) to the support information for the concise of presentation. Please check the detail in section 3.4 in the revised manuscript.
